# Supplementary material for: From genes to ecosystems: Analyzing Ormosia microphylla endangerment driven by multiple dimensions
Source: Research Square preprint supplement (doi:10.21203/rs.3.rs-7231308/v1), 2025-09-02
Supplement: Supplementary file 1 [file b88bc9c98732a43c56889305.docx]

| **Table S1** Population structures of seven survey sites | | | | | | | |
| --- | --- | --- | --- | --- | --- | --- | --- |
| Tree height (m) | Individual number | | | | | | |
| ND | JH | LP | TD | JZ | TBC | CB |
| 0~1.3 | 13 | 529 | 0 | 1 | 36 | 53 | 0 |
| 1.3~2.5 | 17 | 276 | 0 | 17 | 5 | 28 | 0 |
| 2.5~5 | 8 | 148 | 0 | 1 | 0 | 4 | 0 |
| >5 | 12 | 67 | 1 | 8 | 4 | 1 | 10 |

JH, LP, ND, TBC, JZ, TD, and CB refer to the Jianhe, Liping, Nandan, Tangbaocun, Jingzhou, Tongdao, and Chengbu populations, respectively.


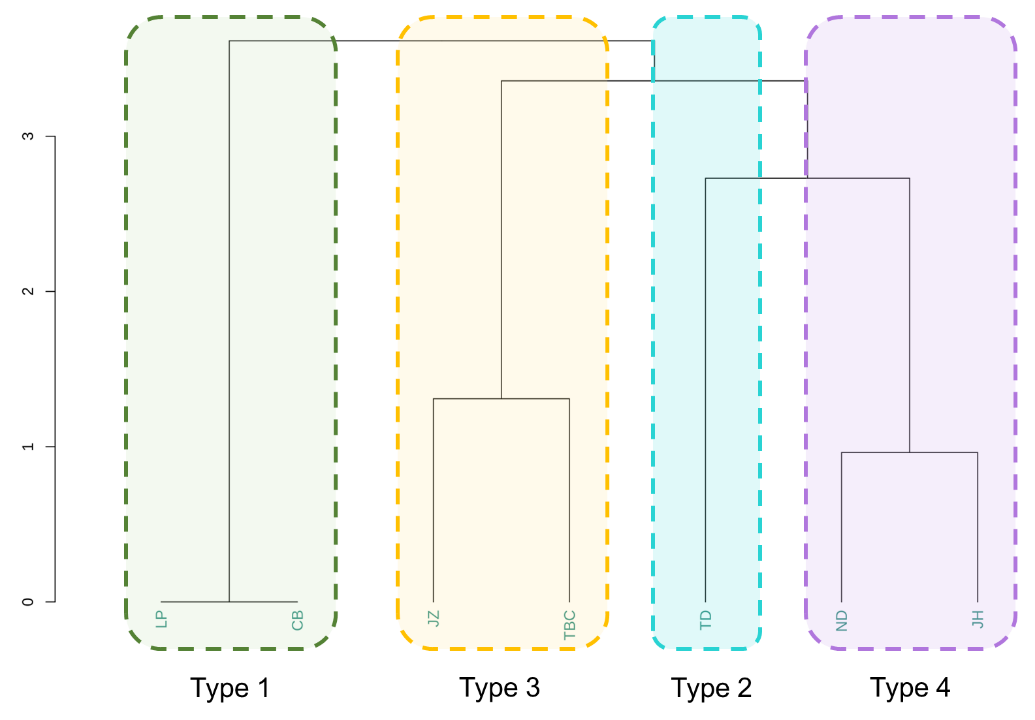


**Figure S1** Clustering analysis based on the *Ormosia microphylla* population age structure. In the picture, JH, LP, ND, TBC, JZ, TD, and CB refer to the Jianhe, Liping, Nandan, Tangbaocun, Jingzhou, Tongdao, and Chengbu populations, respectively.


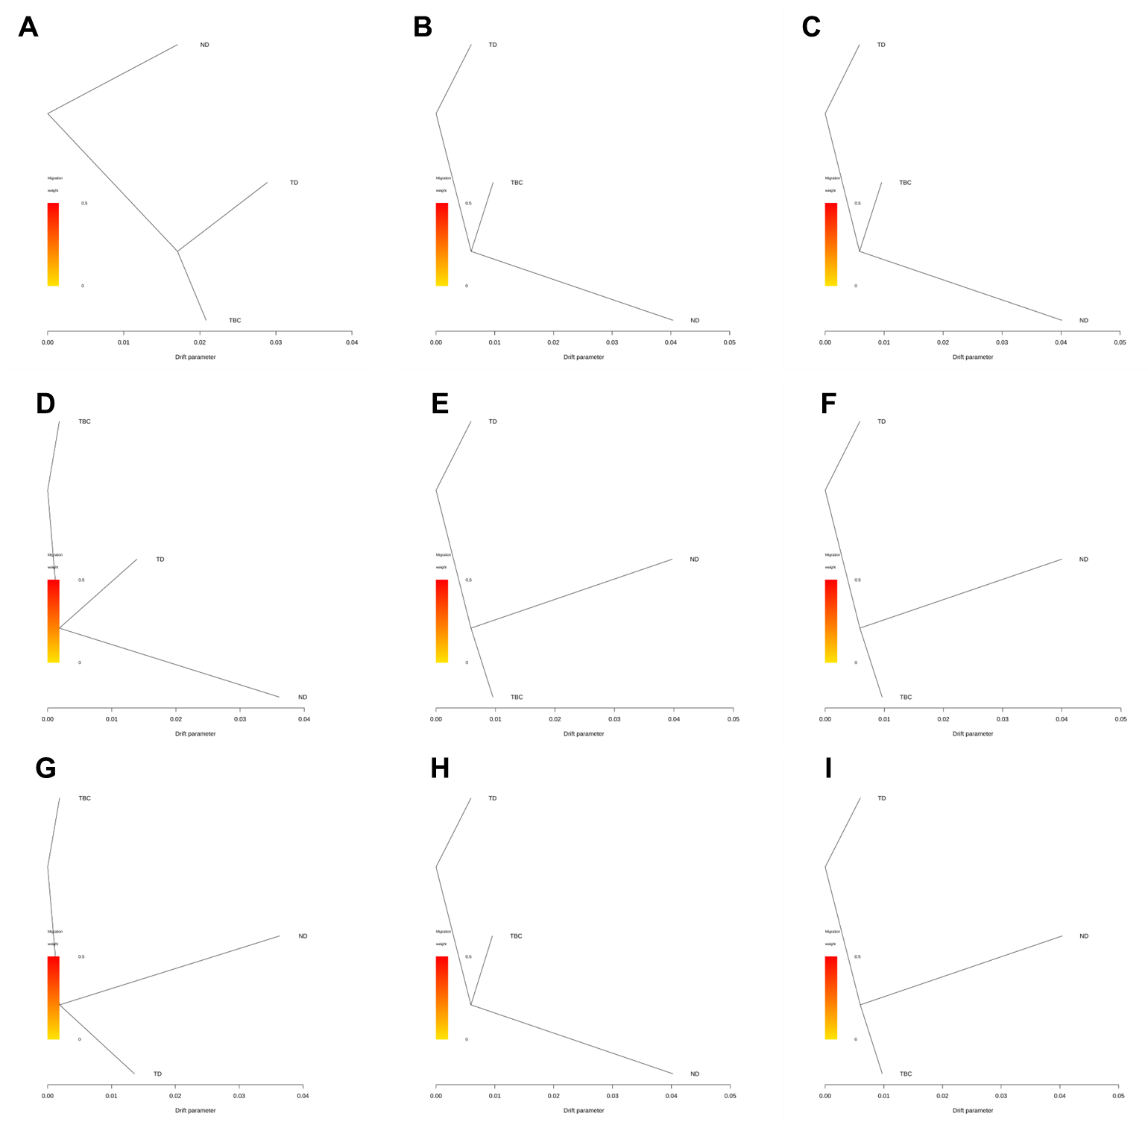


**Figure S2** Gene flow between the GX, HG, and HN genetic clusters of *Ormosia microphylla*.


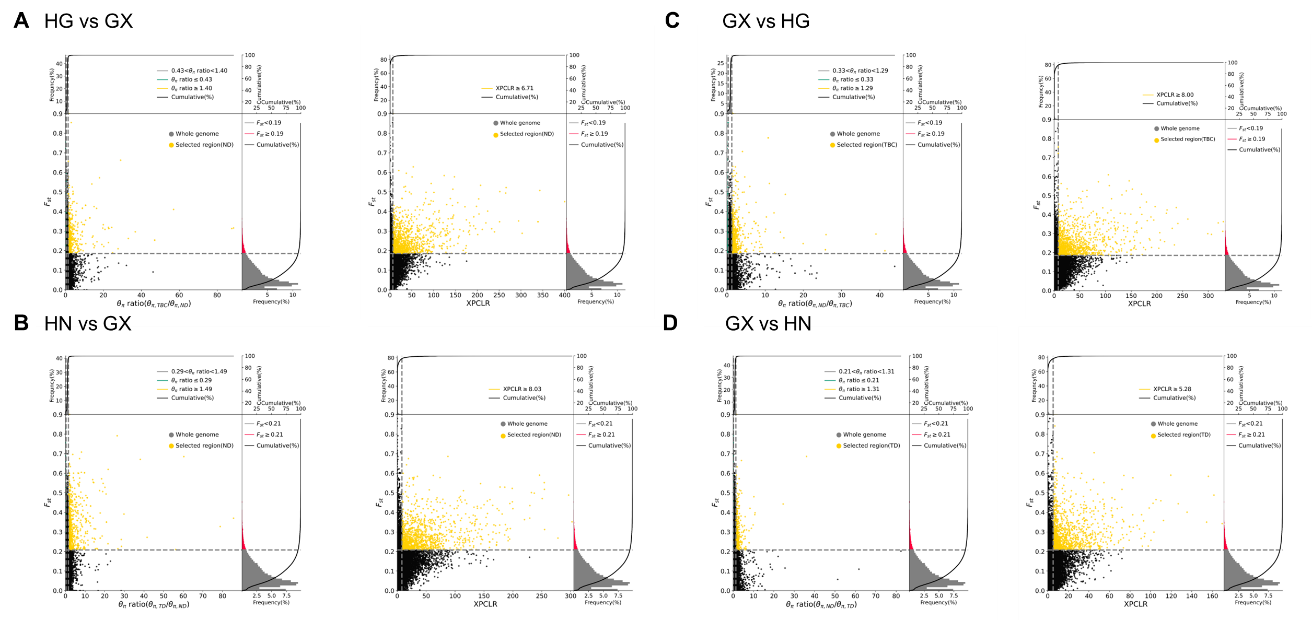


**Figure S3** Genomic regions with selective sweep. Screening of selected genes using HG (A) and HN (B) populations, respectively, with the GX population as the background population; Screening of selected genes using the GX population, respectively, with HG (C) and HN (D) populations.


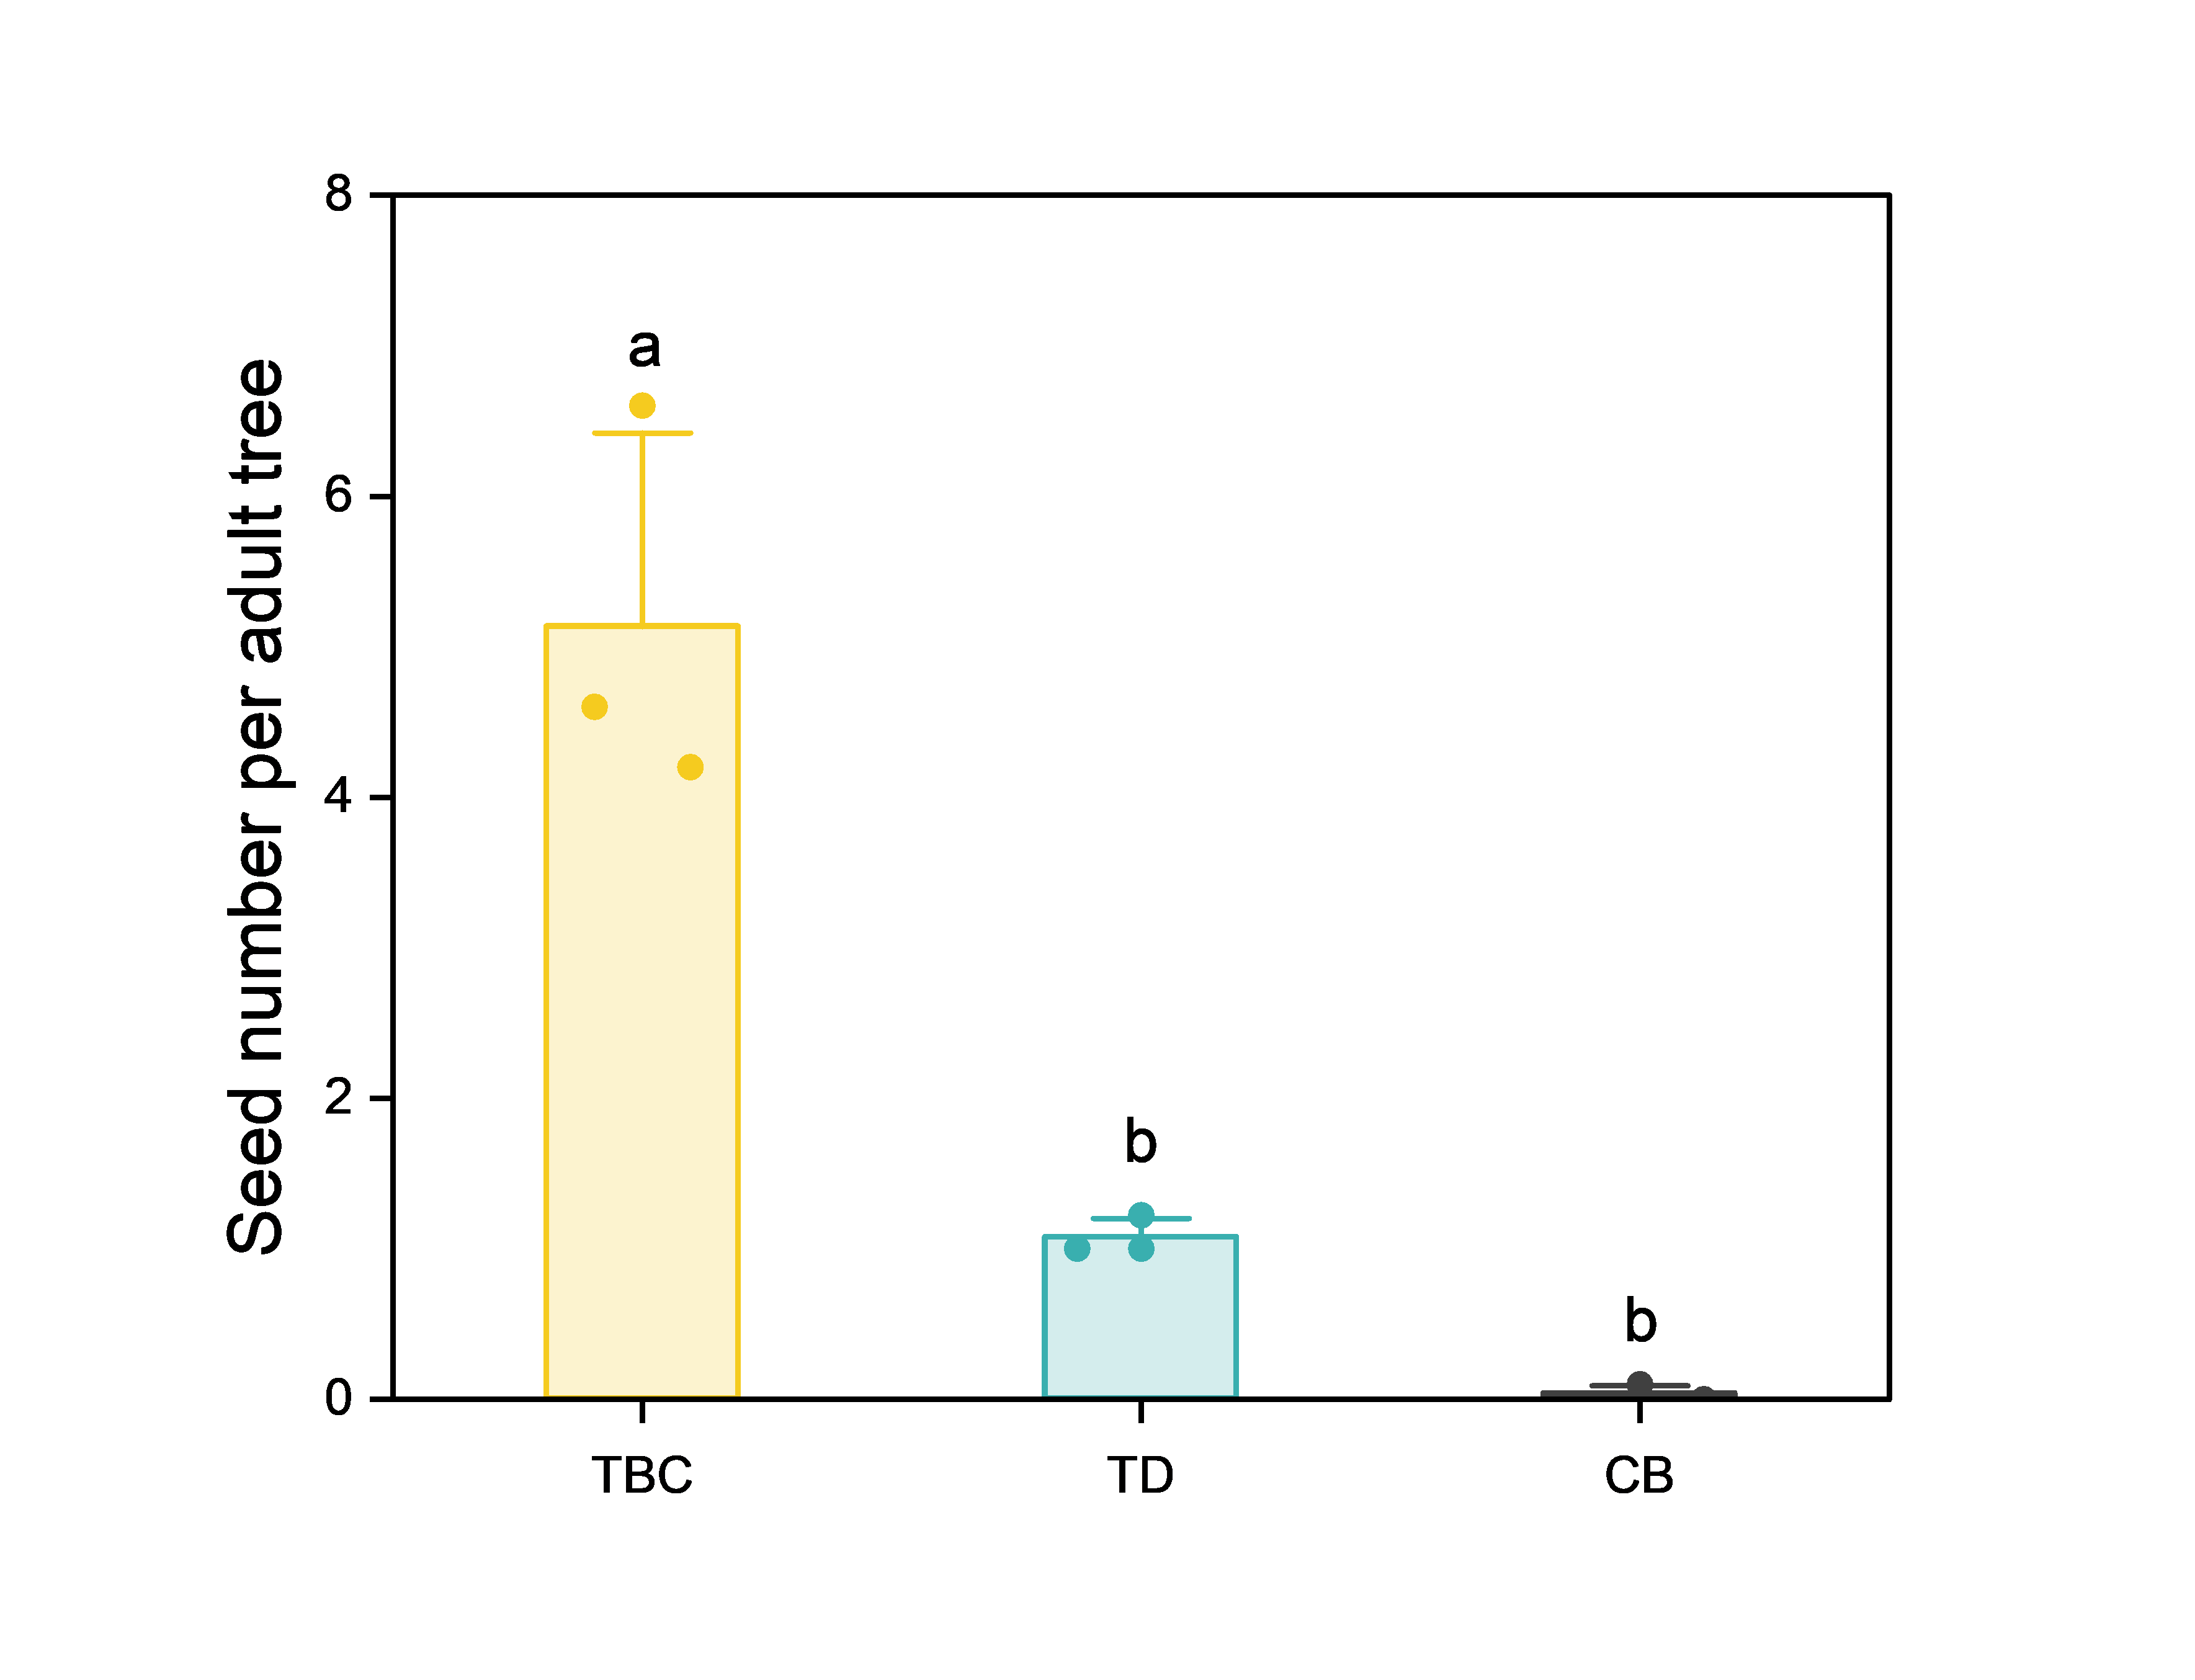


**Figure S4** Seed number of a single *Ormosia microphylla* adult and old tree (with heights > 2.5 m) individual. TD, CB, and TBC refer to the Tongdao, Chengbu, and Tangbaocun populations, respectively. Different letters represent significant differences at *p*<0.05.


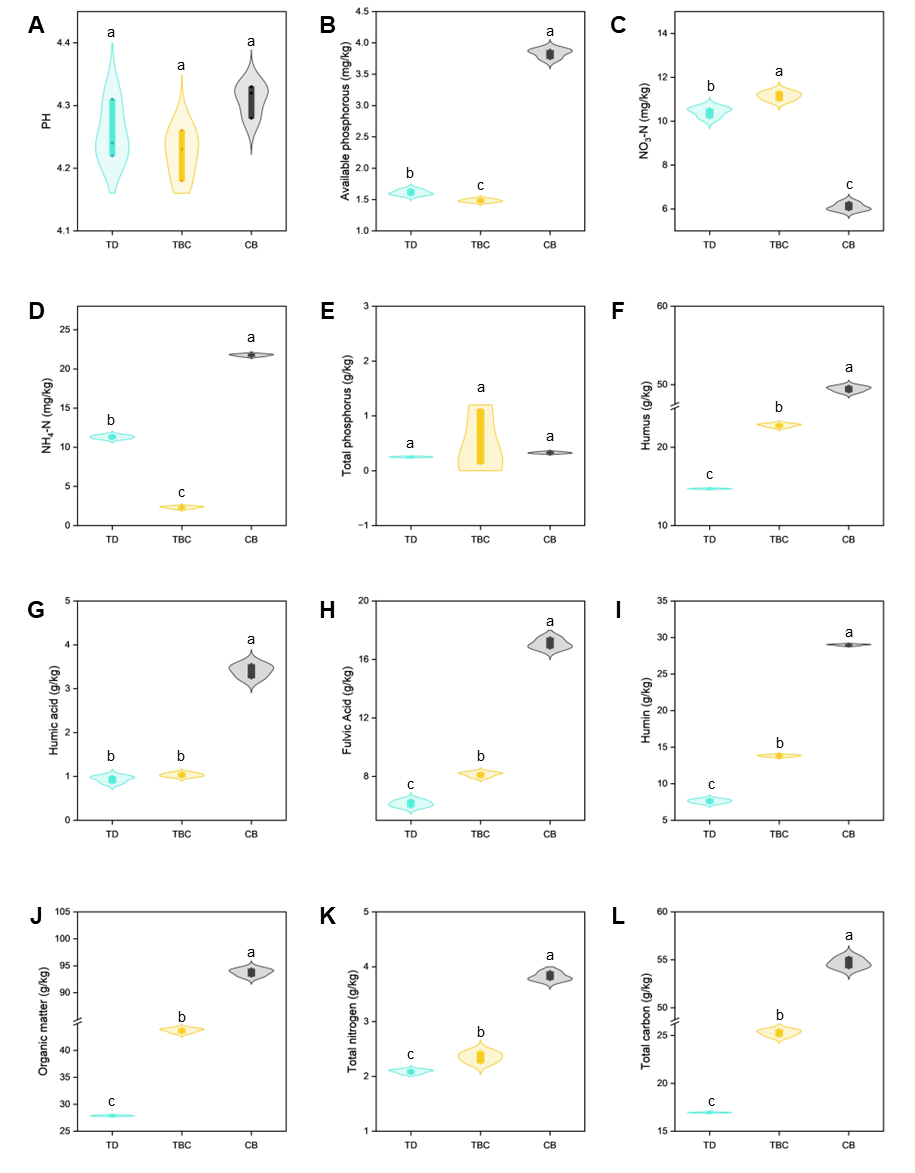


**Figure S5** Soil nutrient composition of representative *Ormosia microphylla* populations. TD, CB, and TBC refer to the Tongdao, Chengbu, and Tangbaocun populations, respectively. Different letters represent significant differences at *p*<0.05.

| **Table S2** Investigated bird species. | | |
| --- | --- | --- |
| Order | Family | Species |
| Galliformes | Phasianidae | *Bambusicola thoracica* |
| Galliformes | Phasianidae | *Lophura nycthemera* |
| Podicipediformes | Podicipedidae | *Tachybaptus ruficollis* |
| Columbiformes | Columbidae | *Streptopelia orientalis* |
| Columbiformes | Columbidae | *Streptopelia chinensis* |
| Pelecaniformes | Ardeidae | *Ardeola bacchus* |
| Piciformes | Capitonidae | *Psilopogon faber* |
| Piciformes | Picidae | *Blythipicus pyrrhotis* |
| Passeriformes | Vireonidae | *Erpornis zantholeuca* |
| Passeriformes | Campephagidae | *Pericrocotus solaris* |
| Passeriformes | Laniidae | *Lanius schach* |
| Passeriformes | Corvidae | *Garrulus glandarius* |
| Passeriformes | Corvidae | *Urocissa erythrorhyncha* |
| Passeriformes | Corvidae | *Dendrocitta formosae* |
| Passeriformes | Corvidae | *Corvus macrorhynchos* |
| Passeriformes | Paridae | *Pardaliparus venustulus* |
| Passeriformes | Paridae | *Parus cinereus* |
| Passeriformes | Hirundinidae | *Hirundo rustica* |
| Passeriformes | Hirundinidae | *Cecropis daurica* |
| Passeriformes | Pycnonotidae | *Spizixos semitorques* |
| Passeriformes | Pycnonotidae | *Pycnonotus xanthorrhous* |
| Passeriformes | Pycnonotidae | *Pycnonotus sinensis* |
| Passeriformes | Pycnonotidae | *Ixos mcclellandii* |
| Passeriformes | Pycnonotidae | *Hemixos castanonotus* |
| Passeriformes | Phylloscopidae | *Phylloscopus inornatus* |
| Passeriformes | Cettiidae | *Abroscopus albogularis* |
| Passeriformes | Cettiidae | *Horornis fortipes* |
| Passeriformes | Aegithalidae | *Aegithalos concinnus* |
| Passeriformes | Sylviidae | *Sinosuthora webbianus* |
| Passeriformes | Sylviidae | *Psittiparus gularis* |
| Passeriformes | Zosteropidae | *Yuhina castaniceps* |
| Passeriformes | Timaliidae | *Erythrogenys gravivox* |
| Passeriformes | Timaliidae | *Erythrogenys swinhoei* |
| Passeriformes | Timaliidae | *Pomatorhinus ruficollis* |
| Passeriformes | Timaliidae | *Cyanoderma ruficeps* |
| Passeriformes | Pellorneidae | *Alcippe morrisonia* |
| Passeriformes | Leiothrichidae | *Garrulax canorus* |
| Passeriformes | Leiothrichidae | *Garrulax perspicillatus* |
| Passeriformes | Leiothrichidae | *Garrulax pectoralis* |
| Passeriformes | Leiothrichidae | *Garrulax sannio* |
| Passeriformes | Leiothrichidae | *Leiothrix lutea* |
| Passeriformes | Muscicapidae | *Tarsiger cyanurus* |
| Passeriformes | Muscicapidae | *Phoenicurus auroreus* |
| Passeriformes | Muscicapidae | *Rhyacornis fuliginosus* |
| Passeriformes | Muscicapidae | *Enicurus schistaceus* |
| Passeriformes | Muscicapidae | *Enicurus leschenaulti* |
| Passeriformes | Estrildidae | *Lonchura striata* |
| Passeriformes | Estrildidae | *Lonchura punctulata* |
| Passeriformes | Passeridae | *Passer montanus* |
| Passeriformes | Motacillidae | *Motacilla cinerea* |
| Passeriformes | Motacillidae | *Motacilla alba* |
| Passeriformes | Motacillidae | *Anthus hodgsoni* |
| Passeriformes | Paridae | *Fringilla montifringilla* |
| Passeriformes | Paridae | *Chloris sinica* |
| Passeriformes | Emberizidae | *Emberiza pusilla* |
| Passeriformes | Emberizidae | *Emberiza spodocephala* |


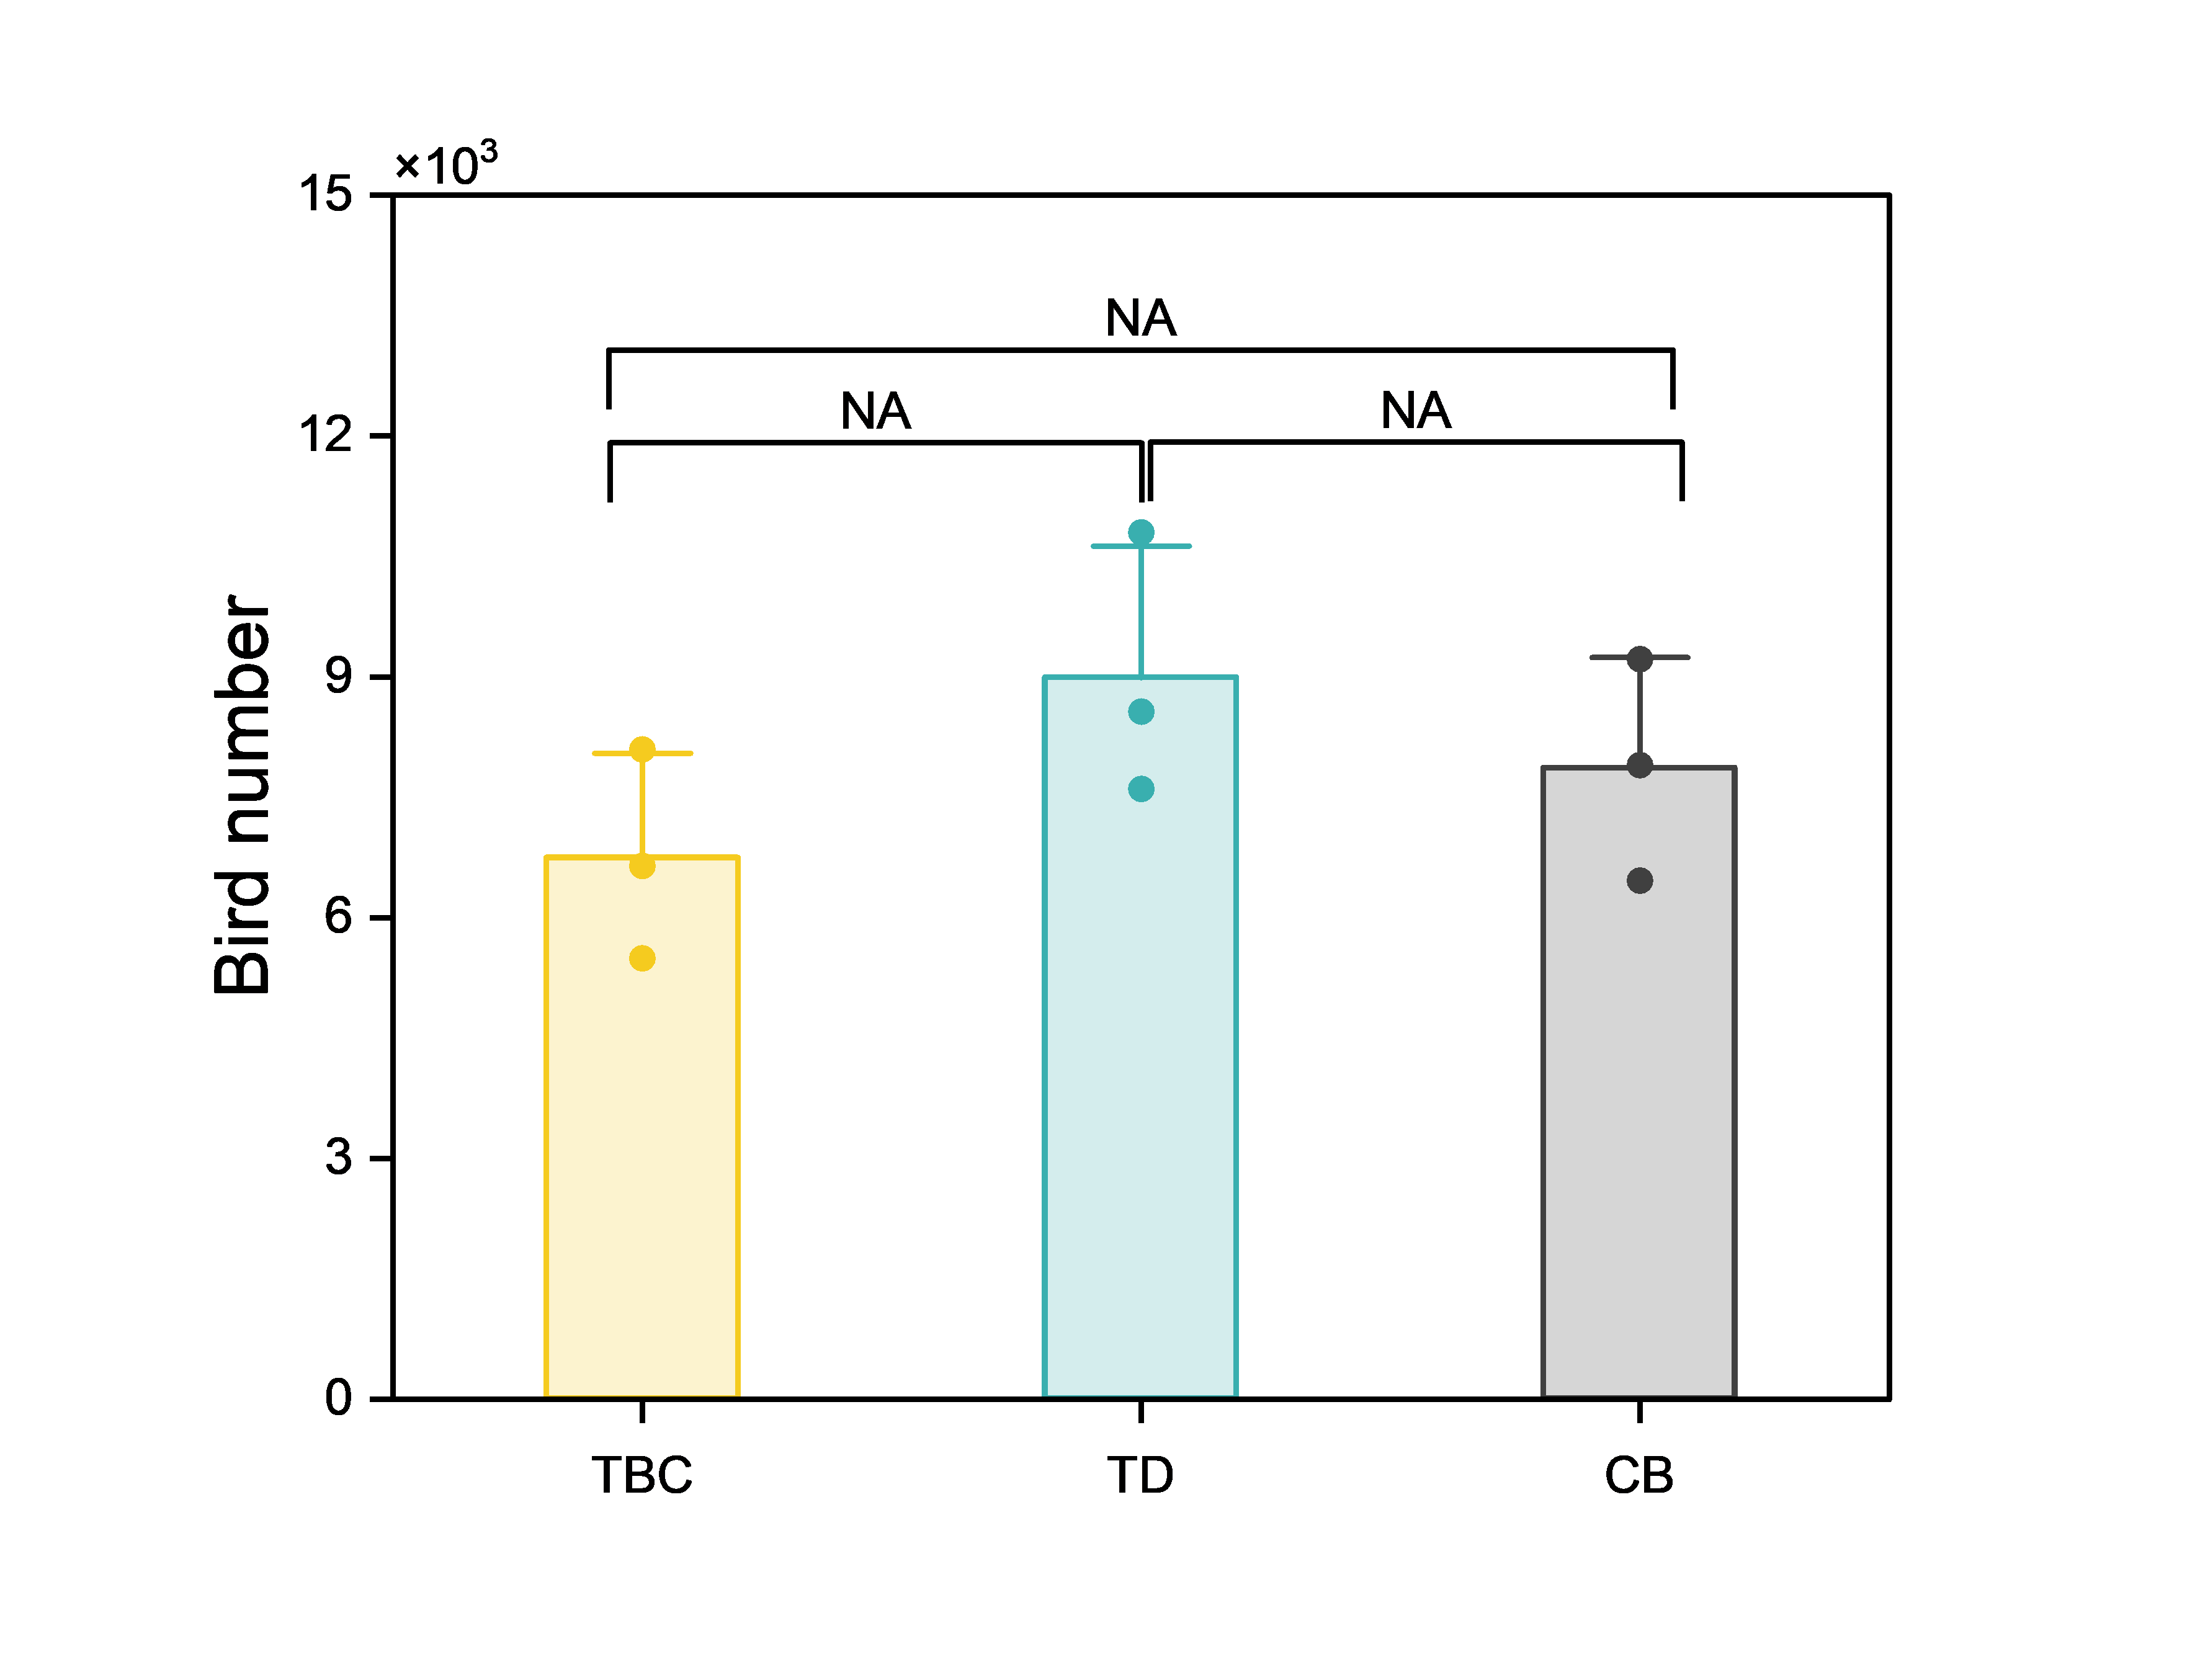


**Figure S5** Number of bird individuals investigated in representative *Ormosia microphylla* populations. TD, CB, and TBC refer to the Tongdao, Chengbu, and Tangbaocun populations, respectively. Different letters represent significant differences at *p*<0.05.
